# Supplementary material for: Valorization of bamboo biomass using combinatorial pretreatments
Source: Royal Society of Chemistry journal article supplement (doi:10.1039/d2gc00301e), 2022-01-01
Supplement: d2gc00301e1.pdf [file d2gc00301e1.pdf]

Supporting information for:

## **Valorization of bamboo biomass using combinatorial pretreatments**

Chen Huang<sup>a,b,c</sup>, Yunni Zhan<sup>a</sup>, Jia Wang<sup>b,c</sup>, Jinyuan Cheng<sup>a</sup>, Xianzhi Meng<sup>c</sup>, Luna Liang<sup>c</sup>, Fangmin Liang<sup>a</sup>, Yongjun Deng<sup>a\*</sup>, Guigan Fang<sup>a,b\*</sup>, Arthur J. Ragauskas<sup>c,d,e,\*</sup>

<sup>a</sup>Institute of Chemical Industry of Forest Products, Chinese Academy of Forestry, Jiangsu Province Key Laboratory of Biomass Energy and Materials, Nanjing 210042, China

<sup>b</sup>Co-Innovation Center for Efficient Processing and Utilization of Forest Resources, Nanjing Forestry University, Nanjing 210037, China

<sup>c</sup>Department of Chemical and Biomolecular Engineering, University of Tennessee Knoxville, Knoxville, TN 37996, USA

<sup>d</sup>Department of Forestry, Wildlife, and Fisheries, Center for Renewable Carbon, The University of Tennessee Institute of Agriculture, Knoxville, TN 37996, USA

<sup>e</sup>Joint Institute for Biological Science, Biosciences Division, Oak Ridge National Laboratory, Oak Ridge, TN 37831, USA

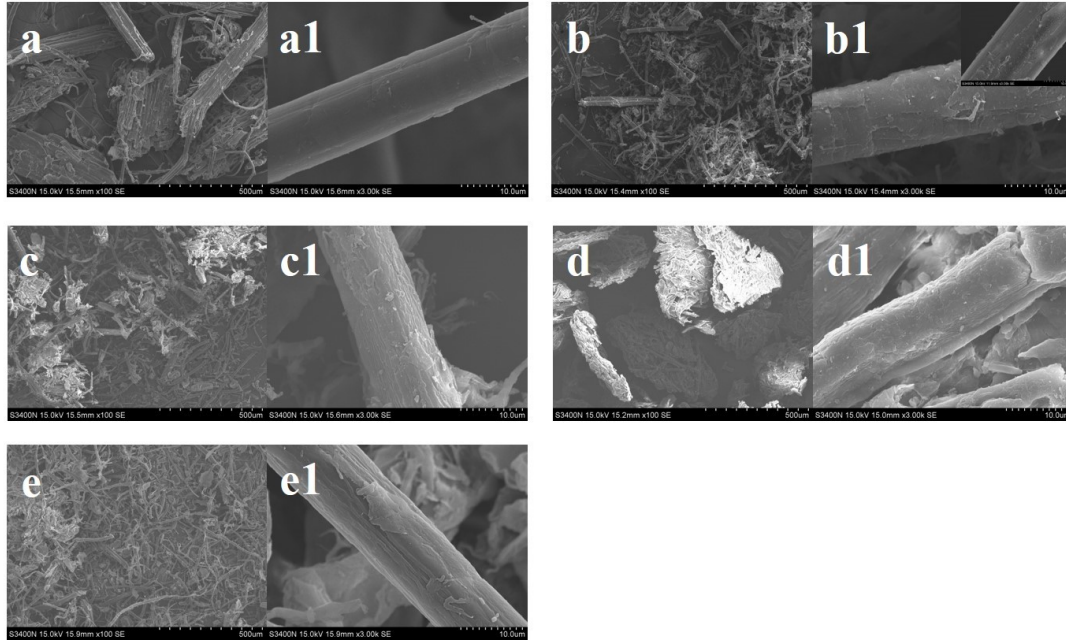

**Fig. S1** Surface morphology of the raw and pretreated samples (a/a1: raw bamboo; b/b1: LHWP treated sample; c/c1: LHWP-BDO treated sample; d/d1: LHWP-DES treated sample; e/e1: LHWP-NaOH treated sample).

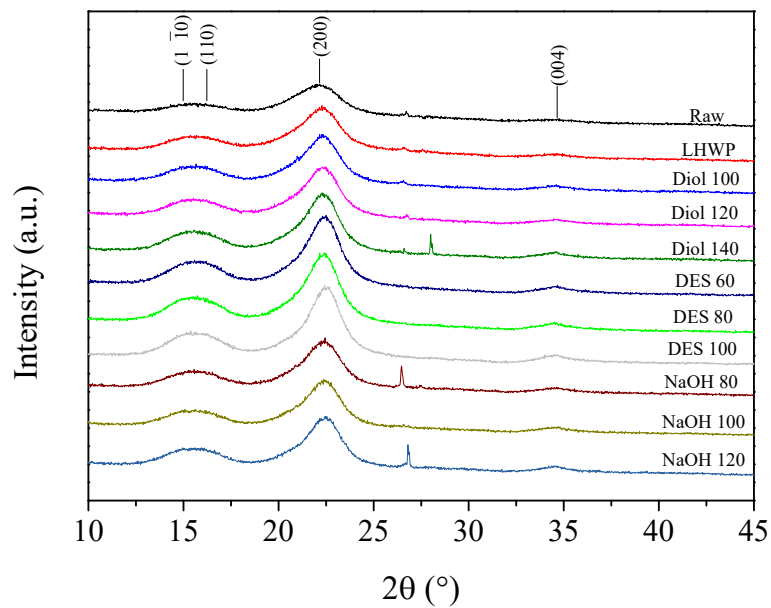

**Fig. S2** XRD patterns of raw and pretreated samples.

**Table S1** Peaks assignment for FTIR spectra.

| Wavenumber (cm <sup>-1</sup> ) | Assignment                                           |
|--------------------------------|------------------------------------------------------|
| 3341                           | O-H stretching                                       |
| 2895                           | C-H stretching                                       |
| 1735                           | C=O ester; carbonyl groups in branched hemicellulose |
| 1601                           | Aromatic ring stretching                             |
| 1510                           | Aromatic ring vibration                              |
| 1454                           | C-H methyl and methylene deformation                 |
| 1422                           | C-H deformation (asymmetric) of cellulose            |
| 1375                           | C-H stretching of cellulose                          |
| 1325                           | C-O vibration of syringyl                            |
| 1239                           | C-O vibration of guaiacyl                            |
| 1160                           | C-O-C asymmetrical stretching                        |
| 1105                           | C-O vibrations of crystalline cellulose              |
| 896                            | $\beta$ -glycosidic linkages in cellulose            |
| 834                            | aromatic C-H deformation                             |

**Table S2** Concentrations of the main byproducts in the prehydrolyzate of LHWP.

| Severity | Formic acid<br>(g/L) | Acetic acid<br>(g/L) | Levulinic acid<br>(g/L) | HMF<br>(g/L) | Furfural<br>(g/L) |
|----------|----------------------|----------------------|-------------------------|--------------|-------------------|
| 2.2      | 0                    | 0                    | 0                       | 0            | 0                 |
| 2.8      | 0                    | 0.21                 | 0                       | 0            | 0                 |
| 3.4      | 0                    | 0.45                 | 0                       | 0            | 0                 |
| 3.7      | 0                    | 0.87                 | 0                       | 0            | 0                 |
| 4.0      | 0.52                 | 1.08                 | 0                       | 0.05         | 1.50              |
| 4.1      | 0.55                 | 1.25                 | 0                       | 0.07         | 1.68              |
| 4.3      | 0.60                 | 1.63                 | 0                       | 0.13         | 2.06              |
| 4.4      | 0.60                 | 1.96                 | 0                       | 0.24         | 2.36              |
| 4.5      | 0.79                 | 2.43                 | 0                       | 0.52         | 3.23              |
